# Supplementary material for: Machine Learning Applications and Advancements in Alcohol Use Disorder: A Systematic Review
Source: bioRxiv or medRxiv preprint supplement (doi:10.1101/2022.06.06.22276057), 2022-06-07
Supplement: Supplementary file [file media-1.pdf]

## Supplementary Materials

**Supplementary Table 1.** Search strategy used for identification of articles on Embase and PubMed Central.

| Database       | Search Strategy                                                                                                                                                                                                                                                                                                                                                                                                                                                                                                                                                                       |
|----------------|---------------------------------------------------------------------------------------------------------------------------------------------------------------------------------------------------------------------------------------------------------------------------------------------------------------------------------------------------------------------------------------------------------------------------------------------------------------------------------------------------------------------------------------------------------------------------------------|
| Embase         | ('alcoholism'/exp OR 'alcohol consumption'/exp OR 'alcohol use disorders identification test'/exp OR 'alcohol psychosis'/exp OR 'alcohol liver disease'/exp OR 'alcohol withdrawal syndrome'/exp OR 'alcoholic cardiomyopathy'/exp OR 'alcohol abuse'/exp OR 'alcoholic pancreatitis'/exp OR 'fetal alcohol syndrome'/exp OR 'alcohol intoxication'/exp OR 'alcohol abstinence'/exp OR 'acamprosate' OR 'disulfiram' OR 'naltrexone' OR 'varenicline' OR 'topiramate' OR 'gabapentin') AND ('machine learning'/exp OR 'artificial intelligence'/exp OR 'decision support system'/exp) |
| PubMed Central | ("alcohol related disorders"[Mesh] OR "alcoholics"[Mesh] OR "alcohol withdrawal delirium"[Mesh] OR "alcohol withdrawal seizures"[Mesh] OR "drinking behavior"[Mesh] OR "alcohol deterrents"[Mesh]) AND ("algorithms"[Mesh] OR "machine learning"[Mesh] OR "natural language processing"[Mesh] OR "neural networks, computer"[Mesh] OR "decision support systems, clinical"[Mesh])                                                                                                                                                                                                     |

**Supplementary Table 2.** Overall scoring for risk of bias assessment.

| <b>Risk of Bias Score</b>              | <b>Rationale</b>                                                                                                                                            |
|----------------------------------------|-------------------------------------------------------------------------------------------------------------------------------------------------------------|
| “LOW”                                  | Data source: multiple sources, or a national database. Missing data: none. External validation: performed.                                                  |
| “MODERATE”                             | Missing data: moderate amount of data missing. All categories: not specified.                                                                               |
| “HIGH”                                 | Data source: data collection from only one clinical site. Missing data: high amount of data missing. External validation: no external validation performed. |
| Overall Risk of Bias Score: “LOW”      | No categories with “HIGH” risk of bias.                                                                                                                     |
| Overall Risk of Bias Score: “MODERATE” | One category with “HIGH” risk of bias, or one or two categories with “MODERATE” risk of bias.                                                               |
| Overall Risk of Bias Score: “HIGH”     | Two or more categories with “HIGH” risk of bias, or three or more categories with “MODERATE” risk of bias.                                                  |

**Supplementary Table 3.** Study design details of selected articles.

| First Author, Year                             | Type of ML algo                                                                              | Sample Size | Data Type                                                    | Ethnicity/race                                                                    | Age                                         | Gender                                  | Comparator or competitor                                                              |
|------------------------------------------------|----------------------------------------------------------------------------------------------|-------------|--------------------------------------------------------------|-----------------------------------------------------------------------------------|---------------------------------------------|-----------------------------------------|---------------------------------------------------------------------------------------|
| Screening                                      |                                                                                              |             |                                                              |                                                                                   |                                             |                                         |                                                                                       |
| Afshar, 2019                                   | NLP; LR, PAC, SVM, SGD                                                                       | 1422        | EHR, including clinical notes                                | 54% White; 18% Hispanic                                                           | Range $\geq 18$                             | 71% male                                | Rules based pre-selected keyword approach (keywords chosen by content experts); AUDIT |
| To, 2020                                       | LR with LASSO; NLP                                                                           | 2422        | EHR, including clinical notes                                | 58% White                                                                         | Range $\geq 18$                             | N/S                                     | None                                                                                  |
| Bonnell, 2020                                  | LR, SVM; NN, k-nearest neighbors, DT, RF (RF used for final model)                           | 43545       | Demographic, clinical and laboratory information             | N/S                                                                               | Range $\geq 18$                             | 49% male                                | AUDIT-C                                                                               |
| Hassanpour, 2019                               | CNN and LSTM                                                                                 | 2287        | Instagram pictures and captions                              | White, Black, Asian, Hispanic                                                     | Range 18+                                   | Males and females                       | None                                                                                  |
| Crocamo, 2020                                  | SVM and RF                                                                                   | 180         | Tweet content                                                | N/S                                                                               | N/S                                         | N/S                                     | None                                                                                  |
| Diagnosis/identification/discrimination of AUD |                                                                                              |             |                                                              |                                                                                   |                                             |                                         |                                                                                       |
| Maurelli, 1998                                 | Genetic algorithm BEAGLE; 7 ANNs; Metasystem taking outputs from ANNs to produce new results | 113         | Blood markers: MCV, ALKPHOS, ALT, AST, GGT                   | N/S                                                                               | N/S                                         | N/S                                     | None                                                                                  |
| Dinevski, 2011                                 | DT                                                                                           | 482         | Blood markers: MCV, GGT, GLDH, AST, ALT                      | N/S                                                                               | Range 18-65                                 | 82-84% male                             | Individual biomarkers                                                                 |
| Pirro, 2013                                    | UNEQ model                                                                                   | 423         | Blood markers: AST, ALT, GGT, MCV, CDT                       | N/S                                                                               | Range 19-74                                 | ~80% male                               | Individual biomarkers                                                                 |
| Lewenstein, 2020                               | ANN                                                                                          | 172         | Polysomnography (EEG, EOG, EMG)                              | N/S                                                                               | Range 30-46                                 | 50% male                                | None                                                                                  |
| Guggenmos, 2018                                | Weighted robust distance-to-centroid classifier                                              | 216         | MRI                                                          | N/S                                                                               | Range 20-65                                 | 84% male                                | None                                                                                  |
| Kamarajan, 2020                                | RF                                                                                           | 60          | fMRI                                                         | 42% Black; 15% White; 35% Asian; 2% American Indian                               | Mean 41 (AUD); 27 (control)                 | 100% male                               | None                                                                                  |
| Gowin, 2020                                    | RF                                                                                           | 486         | fMRI and self-reported psychological / substance use history | AUD: 83% White; 9% Black; 7% Hispanic; Control: 69% White; 20% Black; 9% Hispanic | Mean 28 $\pm$ 3 (AUD); 29 $\pm$ 4 (control) | 72% (binge-drinkers); 33% (non-bingers) | None                                                                                  |
| Hahn, 2020                                     | LR and SVM                                                                                   | 2034        | MRI                                                          | N/S                                                                               | Mean 45 (test-AUD); 42                      | 57% male                                | None                                                                                  |

|                  |                                 |      |                               |                                                                              | (test-control )                                                 |                                                                        |      |
|------------------|---------------------------------|------|-------------------------------|------------------------------------------------------------------------------|-----------------------------------------------------------------|------------------------------------------------------------------------|------|
| Wang, 2019       | AlexNet transfer learning model | 379  | MRI                           | N/S                                                                          | N/S                                                             | N/S                                                                    | None |
| Zhu, 2018        | RF                              | 92   | fMRI                          | AUD: 54% White; 41% Black; 4% Asian; Control: 63% White; 28% Black; 9% Asian | Mean 40±10 (AUD); 32 ±9 (control)                               | 72% male (AUD), 57% male (control)                                     | None |
| Wang, 2017       | CNN                             | 235  | fMRI                          | N/S                                                                          | N/S                                                             | N/S                                                                    | None |
| Adeli, 2019      | LR                              | 549  | fMRI                          | 7% Asian; 21% Black; 61% White; 11% Other                                    | Mean 48 ±10 (AUD); 47±14 (control); 51±9 (HIV); 52±7 (AUD+HIV ) | 54% male (control), 66% male (AUD), 69% male (HIV), 63% male (AUD+HIV) | None |
| Bae, 2017        | SVM                             | 60   | EEG                           | N/S                                                                          | N/S                                                             | N/S                                                                    | None |
| Acharya, 2012    | SVM                             | 122  | EEG                           | N/S                                                                          | N/S                                                             | N/S                                                                    | None |
| Mehla, 2020      | SVM                             | 122  | EEG                           | N/S                                                                          | N/S                                                             | N/S                                                                    | None |
| Hussain, 2018    | k-D tree                        | 58   | EEG                           | N/S                                                                          | Mean 36±5 (AUD); 26±3 (control)                                 | N/S                                                                    | None |
| Padma Shri, 2017 | k-NN                            | 1200 | EEG                           | N/S                                                                          | N/S                                                             | N/S                                                                    | None |
| Mumtaz, 2017     | LR                              | 45   | EEG                           | N/S                                                                          | Mean 55±13 (AUD); 43±16 (control)                               | N/S                                                                    | None |
| Mumtaz, 2018     | SVM                             | 60   | EEG                           | N/S                                                                          | N/S                                                             | N/S                                                                    | None |
| Kumar, 2016      | SVM and FCM                     | 40   | EEG                           | N/S                                                                          | Range 32-38                                                     | 100% male                                                              | None |
| Kumar, 2015      | SVM and FCM                     | 40   | EEG                           | N/S                                                                          | Mean 35                                                         | 100% male                                                              | None |
| Zhang, 2020      | CNN and SVM                     | 125  | EEG                           | N/S                                                                          | Mean 36±5 (AUD); N/A (controls)                                 | 100% male                                                              | None |
| Anuragi, 2019    | LS-SVM                          | 122  | EEG                           | N/S                                                                          | N/S                                                             | N/S                                                                    | None |
| Anuragi, 2020    | LS-SVM                          | 122  | EEG                           | N/S                                                                          | N/S                                                             | N/S                                                                    | None |
| Faust, 2013      | FSC                             | 122  | EEG                           | N/S                                                                          | N/S                                                             | N/S                                                                    | None |
| Zhu, 2014        | HVGE                            | 122  | EEG                           | N/S                                                                          | N/S                                                             | N/S                                                                    | None |
| Chen, 2020       | GS-SVM, CNN, CNN-LSTM           | 297  | SNPs, demographic information | Chinese                                                                      | Range Adults                                                    | 100% male                                                              | None |
| Yu, 2005         | SVM                             | 1204 | Microsatellite markers        | N/S                                                                          | N/S                                                             | N/S                                                                    | None |
| Rosato, 2019     | RF                              | 120  | microRNA                      | 53% European American; 47%                                                   | Range 18+                                                       | 47% male                                                               | None |

|                                  |                                                                                                     |      |                                                                                                                                                                                                                                                                                                                                                             |                                                              |             |                                               |                                                    |
|----------------------------------|-----------------------------------------------------------------------------------------------------|------|-------------------------------------------------------------------------------------------------------------------------------------------------------------------------------------------------------------------------------------------------------------------------------------------------------------------------------------------------------------|--------------------------------------------------------------|-------------|-----------------------------------------------|----------------------------------------------------|
|                                  |                                                                                                     |      |                                                                                                                                                                                                                                                                                                                                                             | African American                                             |             |                                               |                                                    |
| Falk, 2005                       | ANN                                                                                                 | 650  | Risk factors, drinking habits and phenotypic measurements                                                                                                                                                                                                                                                                                                   | N/S                                                          | N/S         | N/S                                           | None                                               |
| Li, 1999                         | ANN                                                                                                 | 699  | Phenotypic ERP300 data; genotypic data; biomarker: MAO; gender                                                                                                                                                                                                                                                                                              | N/S                                                          | N/S         | N/S                                           | None                                               |
| Predicting AUD severity          |                                                                                                     |      |                                                                                                                                                                                                                                                                                                                                                             |                                                              |             |                                               |                                                    |
| Fede, 2019                       | RF                                                                                                  | 59   | fMRI                                                                                                                                                                                                                                                                                                                                                        | N/S                                                          | Range 22-60 | 68% male (primary); 50% male (validation)     | None                                               |
| Risk factors for alcohol use     |                                                                                                     |      |                                                                                                                                                                                                                                                                                                                                                             |                                                              |             |                                               |                                                    |
| Winham, 2016                     | RF                                                                                                  | 3829 | SNPs                                                                                                                                                                                                                                                                                                                                                        | 69% European American; 31% African American                  | Range 18-77 | 46% male                                      | None                                               |
| Predicting future alcohol use    |                                                                                                     |      |                                                                                                                                                                                                                                                                                                                                                             |                                                              |             |                                               |                                                    |
| King, 2011                       | LR                                                                                                  | 8655 | Demographic, medical and psychological history, living conditions, AUDIT questionnaire; behavioral questions; alcohol, drugs and cigarette use; history of abuse; religious beliefs; family history of mental health; stress, anxiety and panic syndrome; List of Threatening Life Experiences Questionnaire; experiences in discrimination; social support | European set: 97% White European Chilean set: 100% Non-white | Range 18-75 | European set: 31% male; Chilean set: 24% male | None                                               |
| Kinreich, 2019                   | SVM                                                                                                 | 656  | EEG, SNPs                                                                                                                                                                                                                                                                                                                                                   | European American and African American                       | Range 12-30 | 57% male                                      | None                                               |
| Prediction of Treatment Outcomes |                                                                                                     |      |                                                                                                                                                                                                                                                                                                                                                             |                                                              |             |                                               |                                                    |
| Symons, 2020                     | RF, BayesNet, NB, SPegasos, RBFN, SMO, REPTree, DTNB, FURIA, Decision table                         | 2236 | Demographic, medical history, alcohol dependence measures, and psychological measures                                                                                                                                                                                                                                                                       | N/S                                                          | Range 18-76 | 65-71% male                                   | 10 psychologists and traditional linear regression |
| Symons, 2019                     | FURIA, ADT, LWL, JRip, RIDOR, SMO, REPTree, SPegasos, Decision Table, RBFNM, BayesNet, DTNB, BFTree | 830  | Demographic and psychometric assessment data, medical history and drinking measures                                                                                                                                                                                                                                                                         | N/S                                                          | Range 18-76 | N/S                                           | 10 addiction therapists                            |

|                   |                                |      |                                                                                                     |                                                   |             |                   |                                                                                                                     |
|-------------------|--------------------------------|------|-----------------------------------------------------------------------------------------------------|---------------------------------------------------|-------------|-------------------|---------------------------------------------------------------------------------------------------------------------|
| Lindner, 2020     | RF                             | 607  | Drinking measures                                                                                   | N/S                                               | N/S         | Males and females | None                                                                                                                |
| Sekutowicz, 2019  | linear SVM                     | 188  | fMRI                                                                                                | N/S                                               | Mean 45     | 84% male          | None                                                                                                                |
| Seo, 2015         | NB, SVM, LVQ                   | 46   | sMRI and fMRI                                                                                       | N/S                                               | Average 40  | 65% male          | ML models that used clinical data including demographics, medical history, and socioeconomic status.                |
| Winterer, 1998 A  | ANN                            | 78   | Quantitative EEG                                                                                    | N/S                                               | Mean 45-48  | 58% male          | None                                                                                                                |
| Winterer, 1998 B  | ANN                            | 78   | Quantitative EEG                                                                                    | N/S                                               | Mean 45-48  | 58% male          | ML models that used clinical data including demographic data, laboratory, psychiatric and neurological measurements |
| Satapathy, 2020   | LR                             | 241  | Demographic, medical and previous rehabilitation history                                            | 73% Caucasian; 17% Black; 8% Hispanic; 0.4% Other | Mean 53     | 81% male          | None                                                                                                                |
| Chih, 2014        | Bayesian network model         | 152  | Behavioral and psychological measures, substance use, and lapse history                             | 83% Caucasians                                    | Range 20-64 | 62% male          | None                                                                                                                |
| Connor, 2007      | Bayesian network model and DTs | 139  | Demographic, medical history, dependence severity, and drinking-related and psychological measures. | N/S                                               | N/S         | Males and females | Discriminant analysis                                                                                               |
| Kurth, 2001       | LR and ANN                     | 49   | Demographic, laboratory values, and alcohol withdrawal assessment data                              | N/S                                               | Range 27-66 | 86% male          | None                                                                                                                |
| Hillemacher, 2012 | RF                             | 200  | Demographic, medical history, and laboratory variables                                              | N/S                                               | Mean 45-48  | 81% male          | None                                                                                                                |
| Burkhardt, 2020   | SVM                            | 1144 | Laboratory variables, sociodemographic measures, and medical history                                | N/S                                               | Mean 43     | 73-79% male       | None                                                                                                                |
| Lapuerta, 1997    | ANN and LR                     | 144  | Laboratory values and clinical variables                                                            | 66% Hispanic; 25% White; 5% African-American      | Mean 40     | 83% male          | Maddrey score                                                                                                       |
| Choi, 2020        | LR, DT, and MLP                | 8937 | Demographic, psychological and behavioral data                                                      | East Asian                                        | <65; 65+    | Males and females | None                                                                                                                |
| Hou, 2015         | IT, TRM, and VT                | 251  | SNPs                                                                                                | Hispanic and others                               | Range 20-78 | N/S               | None                                                                                                                |
| Wei, 2020         | IT-LT                          | 251  | SNPs                                                                                                | Hispanic and others                               | Range 20-78 | N/S               | None                                                                                                                |
| Laska, 2020       | RF                             | 338  | Demographic, substance use indicators, and psychiatric characteristics                              | 65-77% White; 16-23% Black                        | Mean 50     | 66% male          | None                                                                                                                |

|                                       |                                                    |        |                                                                         |                                                        |             |             |      |
|---------------------------------------|----------------------------------------------------|--------|-------------------------------------------------------------------------|--------------------------------------------------------|-------------|-------------|------|
| Lin, 2020                             | RF                                                 | 93     | Demographic, OPRM1 promoter region DNA methylation                      | 44% African American; 36% European American            | Range 50-51 | 100% male   | None |
| Predicting treatment seeking behavior |                                                    |        |                                                                         |                                                        |             |             |      |
| Lee, 2019                             | ADT, RF, RT                                        | 1114   | Behavioral and psychological data                                       | 39-73% African American; 20-52% Caucasian; 7-13% Other | Range 21-69 | 64-77% male | None |
| AUD in Adolescents                    |                                                    |        |                                                                         |                                                        |             |             |      |
| Squeglia, 2017                        | RF                                                 | 137    | sMRI, fMRI, demographic, neuropsychological data                        | 68% Caucasian; 32% N/S                                 | Range 12-16 | 56% male    | None |
| Whelan, 2014                          | Voxelwise LR, Regularized LR                       | 2000   | sMRI, fMRI, demographic, neuropsychological data                        | Caucasian                                              | Range 14-18 | 48% male    | None |
| Afzali, 2019                          | LR, SVM, RF, NN, Lasso Reg, Ridge Reg, Elastic-net | 6016   | Demographic, psychopathological, personality, risk behaviors, cognitive | N/S                                                    | Range 12-16 | N/S         | None |
| Ruan, 2019                            | SVM                                                | 2000   | rsMRI, fMRI, rsFC, SNPs, personality, cognitive                         | Caucasian                                              | Range 14-19 | 49% male    | None |
| Vázquez, 2020                         | Elastic net, k-nearest neighbors, NN, RF           | 191880 | Demographic, socioecological, personality,                              | Mexican                                                | Range 10-12 | 51% male    | None |
| García, 2009                          | ANN, Decision trees, Naive bayes                   | 7030   | Personality variables from survey                                       | Mexican                                                | Range 14-18 | N/S         | None |
| Weidacker, 2020                       | RVR                                                | 3064   | sMRI, fMRI, demographic, behavioural data                               | N/S                                                    | Range 15-26 | 67% male    | None |
| O'Halloran, 2020                      | Elastic net                                        | 79     | EEG, demographic, personality, drinking behavior, task-based tests      | N/S                                                    | Range 18+   | 49% male    | None |
| O'Halloran, 2018                      | Elastic net                                        | 106    | Demographic, behavioural, personality                                   | N/S                                                    | Range 18-21 | 66% male    | None |
| Martinez-Loredo, 2018                 | Binary logistic regression                         | 1239   | Demographic, behavioural, personality                                   | Spaniards                                              | Range <15   | 54% male    | None |

**Abbreviations:** Alanine aminotransferase (ALT); Alcohol use disorder (AUD); Alcohol Use Disorder Identification test (AUDIT); Alkaline phosphates (ALKPHOS); Alternating decision tree (ADT); Artificial neural network (ANN); Aspartate aminotransferase (AST); Biologic Evolutionary Algorithm Generating Logical Expressions (BEAGLE); Best-first decision tree (BFTree); Carbohydrate-deficient transferrin (CDT); Convolutional neural network (CNN); Decision table naive bayes (DTNB); Decision tree (DT); Electroencephalographic (EEG); Electromyogram (EMG); Electronic health record (EHR); Electrooculograms (EOG); Event-related potential (ERP); Functional MRI (fMRI); Fuzzy C-mean (FCM); Fuzzy sugeno classifier (FSC); Fuzzy unordered rule induction algorithm (FURIA); Gamma-glutamyl transpeptidasis (GGT); Glutamate dehydrogenase (GLDH); Horizontal visibility graph entropy (HVGE); Interaction tree (IT); Interaction tree for longitudinal trajectories (IT-LT); Learning vector quantization (LVQ); Least Absolute Shrinkage and Selection Operator (LASSO); Locally weighted learning (LWL); Logistic regression (LR); Long short-term memory (LSTM); Magnetic resonance imaging (MRI); Mean corpuscular volume (MCV); Monoamine oxidase (MAO); Multilayer perceptron model (MLP); Multivariate unequal dispersed classes (UNEQ); Naïve Bayes (NB); Natural language

processing (NLP); Neural network (NN); Passive Aggressive Classifier (PAC); Radial basis function neural networks (RBFN); Random forest (RF); Random tree (RT); Reduced-error pruning tree (REPTree); Relevant Vector Regression (RVR); Resting-state functional connectivity (rsFC); Ripple down rule learner (RIDOR); Sequential minimal optimization (SMO); Single nucleotide polymorphism (SNP); Support vector machine (SVM); Traditional regression method (TRM); Virtual twins (VT)



**Supplementary Table 4.** Risk of bias assessment of selected studies

| First Author, Year                             | Sample source                                    | Missing data  | External Validation | Other sources                                                                                                                  | Overall risk |
|------------------------------------------------|--------------------------------------------------|---------------|---------------------|--------------------------------------------------------------------------------------------------------------------------------|--------------|
| Screening                                      |                                                  |               |                     |                                                                                                                                |              |
| Afshar, 2019                                   | HIGH; 1 source                                   | LOW           | HIGH: no            | MODERATE: based on clinical notes analyzed from 1 center, and language variation in clinical notes in other locations may vary | HIGH         |
| To, 2020                                       | HIGH; 1 source                                   | LOW           | HIGH: no            | MODERATE: based on clinical notes analyzed from 1 center, and language variation in clinical notes in other locations may vary | HIGH         |
| Bonnell, 2020                                  | LOW; Large dataset                               | LOW           | HIGH: no            | HIGH: did not use EHR to build algorithm, but target is to use tool on EHR, which has a much higher %age of missing data       | HIGH         |
| Hassanpour, 2019                               | HIGH; Social media platform                      | MODERATE: N/S | HIGH: no            | LOW: N/S                                                                                                                       | HIGH         |
| Crocamo, 2020                                  | MODERATE; Social media platform                  | MODERATE: N/S | HIGH: no            | HIGH: ambiguities in assessing tweets                                                                                          | HIGH         |
| Diagnosis/identification/discrimination of AUD |                                                  |               |                     |                                                                                                                                |              |
| Maurelli, 1998                                 | HIGH; 1 source                                   | MODERATE: N/S | HIGH: no            | LOW: N/S                                                                                                                       | HIGH         |
| Dinevski, 2011                                 | HIGH; 1 site                                     | LOW           | HIGH: no            | MODERATE: Control patients and patients with alcohol dependence syndrome from different sources                                | HIGH         |
| Pirro, 2013                                    | MODERATE; 2 sites                                | LOW           | HIGH: no            | LOW: N/S                                                                                                                       | MODERATE     |
| Lewenstein, 2020                               | HIGH; 1 source                                   | MODERATE: N/S | HIGH: no            | LOW: N/S                                                                                                                       | HIGH         |
| Guggenmos, 2018                                | LOW; Multisite study                             | MODERATE: N/S | LOW: yes            | LOW: N/S                                                                                                                       | MODERATE     |
| Kamarajan, 2020                                | MODERATE; 1 source but from larger study         | MODERATE: N/S | HIGH: no            | LOW: N/S                                                                                                                       | MODERATE     |
| Gowin, 2020                                    | MODERATE; 1 source but sampled from larger study | MODERATE: N/S | HIGH: no            | LOW: N/S                                                                                                                       | MODERATE     |

|                         |                                       |               |          |          |          |
|-------------------------|---------------------------------------|---------------|----------|----------|----------|
| Hahn, 2020              | LOW; Multisite study                  | MODERATE: N/S | LOW: yes | LOW: N/S | LOW      |
| Wang, 2019              | HIGH; 1 source                        | MODERATE: N/S | LOW: yes | LOW: N/S | MODERATE |
| Zhu, 2018               | LOW; NIH recruited                    | MODERATE: N/S | HIGH: no | LOW: N/S | MODERATE |
| Wang, 2017              | LOW; 3 sites                          | MODERATE: N/S | HIGH: no | LOW: N/S | MODERATE |
| Adeli, 2019             |                                       | MODERATE: N/S | HIGH: no | LOW: N/S | MODERATE |
| Bae, 2017               | LOW; Repository for large datasets    | MODERATE: N/S | HIGH: no | LOW: N/S | MODERATE |
| Acharya, 2012           | LOW; Repository for large datasets    | MODERATE      | HIGH: no | LOW: N/S | MODERATE |
| Mehla, 2020             | LOW; Repository for large datasets    | MODERATE      | HIGH: no | LOW: N/S | MODERATE |
| Hussain, 2018           | LOW; Repository for large datasets    | MODERATE: N/S | HIGH: no | LOW: N/S | MODERATE |
| Padma Shri, 2017        | HIGH; 1 site                          | MODERATE: N/S | HIGH: no | LOW: N/S | HIGH     |
| Mumtaz, 2017            | HIGH; 1 site                          | MODERATE: N/S | HIGH: no | LOW: N/S | HIGH     |
| Mumtaz, 2018            | MODERATE; N/S                         | MODERATE: N/S | HIGH: no | LOW: N/S | HIGH     |
| Kumar, 2016             | HIGH; 1 source                        | MODERATE: N/S | HIGH: no | LOW: N/S | HIGH     |
| Kumar, 2015             | HIGH; 1 source                        | MODERATE: N/S | HIGH: no | LOW: N/S | HIGH     |
| Zhang, 2020             | LOW; Repository for large datasets    | MODERATE: N/S | HIGH: no | LOW: N/S | MODERATE |
| Anuragi, 2019           | LOW; Repository for large datasets    | MODERATE      | HIGH: no | LOW: N/S | MODERATE |
| Anuragi, 2020           | LOW; Repository for large datasets    | MODERATE      | HIGH: no | LOW: N/S | MODERATE |
| Faust, 2013             | LOW; Repository for large datasets    | MODERATE      | HIGH: no | LOW: N/S | MODERATE |
| Zhu, 2014               | LOW; Repository for large datasets    | MODERATE      | HIGH: no | LOW: N/S | MODERATE |
| Chen, 2020              | HIGH; 1 site                          | MODERATE: N/S | HIGH: no | LOW: N/S | HIGH     |
| Yu, 2005                | LOW; 9 sites across the US            | MODERATE: N/S | HIGH: no | LOW: N/S | MODERATE |
| Rosato, 2019            | HIGH; 1 site                          | MODERATE: N/S | HIGH: no | LOW: N/S | HIGH     |
| Falk, 2005              | LOW; 9 sites across the US            | MODERATE: N/S | HIGH: no | LOW: N/S | MODERATE |
| Li, 1999                | LOW; 9 sites across the US            | MODERATE: N/S | HIGH: no | LOW: N/S | MODERATE |
| Predicting AUD severity |                                       |               |          |          |          |
| Fede, 2019              | MODERATE; 1 source but from community | MODERATE: N/S | LOW: yes | LOW: N/S | MODERATE |

| Risk factors for alcohol use          |                                       |               |               |                                                                                           |          |
|---------------------------------------|---------------------------------------|---------------|---------------|-------------------------------------------------------------------------------------------|----------|
| Winham, 2016                          | LOW; Multisite study                  | MODERATE: N/S | HIGH: no      | LOW: N/S                                                                                  | MODERATE |
| Predicting future alcohol use         |                                       |               |               |                                                                                           |          |
| King, 2011                            | LOW; Large dataset across 6 countries | LOW           | LOW: yes      | LOW: N/S                                                                                  | LOW      |
| Kinreich, 2019                        | LOW; 9 sites across the US            | MODERATE: N/S | HIGH: no      | LOW: N/S                                                                                  | MODERATE |
| Prediction of Treatment Outcomes      |                                       |               |               |                                                                                           |          |
| Symons, 2020                          | HIGH; 1 site                          | HIGH          | HIGH: no      | LOW: N/S                                                                                  | HIGH     |
| Symons, 2019                          | HIGH; 1 site                          | HIGH          | HIGH: no      | LOW: N/S                                                                                  | HIGH     |
| Lindner, 2020                         | HIGH; 1 site                          | HIGH          | HIGH: no      | LOW: N/S                                                                                  | HIGH     |
| Sekutowicz, 2019                      | LOW; Multisite study                  | MODERATE: N/S | HIGH: no      | LOW: N/S                                                                                  | MODERATE |
| Seo, 2015                             | MODERATE; N/S                         | MODERATE: N/S | HIGH: no      | LOW: N/S                                                                                  | HIGH     |
| Winterer, 1998 A                      | HIGH; 1 site                          | MODERATE: N/S | MODERATE: N/S | LOW: N/S                                                                                  | HIGH     |
| Winterer, 1998 B                      | HIGH; 1 site                          | MODERATE: N/S | MODERATE: N/S | LOW: N/S                                                                                  | MODERATE |
| Satapathy, 2020                       | HIGH; 1 site                          | HIGH          | HIGH: no      | MODERATE: Patients with extensive history of prior rehabilitation did receive transplants | HIGH     |
| Chih, 2014                            | LOW; 2 sites                          | LOW           | LOW: yes      | LOW: N/S                                                                                  | LOW      |
| Connor, 2007                          | MODERATE; N/S                         | LOW           | MODERATE: N/S | LOW: N/S                                                                                  | MODERATE |
| Kurth, 2001                           | MODERATE; N/S                         | MODERATE: N/S | MODERATE: N/S | LOW: N/S                                                                                  | MODERATE |
| Hillemacher, 2012                     | HIGH; 1 source                        | LOW           | HIGH: no      | LOW: N/S                                                                                  | HIGH     |
| Burkhardt, 2020                       | LOW; 2 sites                          | MODERATE      | LOW: yes      | LOW: N/S                                                                                  | MODERATE |
| Lapuerta, 1997                        | MODERATE; N/S                         | MODERATE: N/S | LOW: yes      | LOW: N/S                                                                                  | MODERATE |
| Choi, 2020                            | LOW; Nationwide study Korea           | MODERATE      | LOW: yes      | LOW: N/S                                                                                  | MODERATE |
| Hou, 2015                             | LOW; 2 sites                          | LOW           | HIGH: no      | LOW: N/S                                                                                  | MODERATE |
| Wei, 2020                             | LOW; 2 sites                          | LOW           | MODERATE: N/S | LOW: N/S                                                                                  | MODERATE |
| Laska, 2020                           | LOW; Multisite study                  | HIGH          | MODERATE: N/S | LOW: N/S                                                                                  | MODERATE |
| Lin, 2020                             | LOW; Multisite study                  | MODERATE      | HIGH: no      | HIGH: Cell heterogeneity from blood samples; Single population                            | HIGH     |
| Predicting treatment seeking behavior |                                       |               |               |                                                                                           |          |
| Lee, 2019                             | LOW; Multisite study                  | MODERATE      | LOW: yes      | LOW: N/S                                                                                  | MODERATE |

| AUD in Adolescents    |                        |               |               |          |          |
|-----------------------|------------------------|---------------|---------------|----------|----------|
| Squeglia, 2017        | LOW; Multisource study | LOW           | HIGH: no      | LOW: N/S | MODERATE |
| Whelan, 2014          | LOW; Multisite study   | LOW           | LOW: yes      | LOW: N/S | LOW      |
| Afzali, 2019          | LOW; 2 sites           | LOW           | HIGH: no      | LOW: N/S | MODERATE |
| Ruan, 2019            | LOW; Multisite study   | LOW           | HIGH: no      | LOW: N/S | MODERATE |
| Vázquez, 2020         | LOW; Multisource study | HIGH          | MODERATE: N/S | LOW: N/S | MODERATE |
| García, 2009          | MODERATE; N/S          | MODERATE: N/S | HIGH: no      | LOW: N/S | HIGH     |
| Weidacker, 2020       | LOW; Multisite study   | MODERATE: N/S | HIGH: no      | LOW: N/S | MODERATE |
| O'Halloran, 2020      | HIGH; 1 source         | MODERATE: N/S | HIGH: no      | LOW: N/S | HIGH     |
| O'Halloran, 2018      | LOW; 2 sites           | MODERATE: N/S | HIGH: no      | LOW: N/S | MODERATE |
| Martínez-Loredo, 2018 | LOW; 22 sites          | LOW           | HIGH: no      | LOW: N/S | MODERATE |

Abbreviations: Electroencephalographic (EEG); Electronic health record (EHR); Not specified (NS).
